# Supplementary material for: Green manure intercropping reshapes beneficial microbial consortia to enhance soil multifunctionality and agroecosystem resilience
Source: Research Square preprint supplement (doi:10.21203/rs.3.rs-7449409/v1), 2025-09-19
Supplement: Supplementary file 1 [file 9d683649f12ebfd79eef2404.docx]

Green manure intercropping reshapes beneficial microbial consortia to enhance soil multifunctionality and agroecosystem resilience

*AUTHOR NAMES*

*Gaosen Zhang a,1,Yiming Zhao* *b,c,d,1, Xiaoyi Liu e, Xinyue Wang b,c,d,* *Jiří Doležan f, Pierre Liancourt g, Jiansheng Ye e,* *Jiudong Zhang h *, Yong Chen b,c,d **

AUTHOR ADDRESS

a Northwest Institute of Eco-Environment and Resources, Chinese Academy of Sciences (CAS), Lanzhou, 730000, China

b School of Life Sciences, Lanzhou university, 730000, China

c The Key Laboratory of Cell Activity and Adversity Adaptation, Ministry of Education, School of Life Sciences, Lanzhou University, Lanzhou, 730000, China

d Key Laboratory of Gene Editing for Breeding, Gansu Province, 730000, China

e College of ecology, Lanzhou university, 730000, China

f Institute of Botany of the Czech Academy of Sciences, Průhonice, Czech Republic

g Faculty of Science, University of South Bohemia, Branišovská 1760, 370 05 České Budějovice, Czech Republic

h Institute of Soil, Fertilizer, and Water Saving Agriculture, Gansu Academy of Agricultural Sciences, Lanzhou, Gansu, 730070, China

*Corresponding author:

Yong Chen

School of Life Sciences, Lanzhou University, 730000, China.

Email addresses: [chenyong@lzu.edu.cn](mailto:chenyong@lzu.edu.cn)

Jiudong Zhang

Institute of Soil, Fertilizer, and Water Saving Agriculture, Gansu Academy of Agricultural Sciences, Lanzhou, Gansu, 730070, China.

E-mail addresses: jiudongzhang1@163.com

1 These authors contributed equally to this work.

**Table S1. Functional classification of beneficial microorganisms in soil at the genus level**

| **Function** | **Genus** | **Function** | **Genus** |
| --- | --- | --- | --- |
| **NPK** **Nutrient Absorption （NPK）** | *Microvirga* | **Pathogen Antagonism（PA）** | *Streptomyces* |
| *Bradyrhizobium* | *Micromonospora* |
| *Mesorhizobium* | *Amycolatopsis* |
| *Arthrobacter* | *Bacillus* |
| *Methylobacterium* | *Pseudomonas* |
| *Rhizobium* | *Stenotrophomonas* |
| *Pseudomonas* | *Herbaspirillum* |
| *Sinorhizobium* | *Brevibacillus* |
| *Bacillus* | *Curtobacterium* |
| *Frankia* | *Enterobacter* |
| *Burkholderia* | *Ochrobactrum* |
| *Ensifer* | *Chryseobacterium* |
| *Cupriavidus* | *Octadecabacter* |
| *Agrobacterium* | *Trichoderma* |
| *Stenotrophomonas* | **Drought Resisting (DR)** | *Bacillus* |
| *Thiobacillus* | *Pseudomonas* |
| *Herbaspirillum* | *Paenibacillus* |
| *Shinella* | *Flavobacterium* |
| *Rhizopus* | *Klebsiella* |
| *Azorhizobium* | *Lactobacillus* |
| *Neorhizobium* | *Enterobacter* |
| *Acinetobacter* | *Pedobacter* |
| *Brevibacillus* | *Proteus* |
| *Pararhizobium* | *Alcaligenes* |
| *Aspergillus* | **Plastic Degradation**  **（PD）** | *Mycobacterium* |
| *Acaryochloris* | *Conexibacter* |
| *Enterobacter* | *Bacillus* |
| *Ochrobactrum* | *Pseudomonas* |
| *Priestia* | *Nocardia* |
| *Serratia* | *Ideonella* |
| *Micrococcus* | *Marinobacterium* |
| *Fusarium* | *Alcanivorax* |
| *Allorhizobium* | *Thioclava* |
|  | *Ketobacter* |
|  | *Lentibacter* |

**Table S2. Indicators used in the calculation of EMF**

| **Description** | **Indicators** |
| --- | --- |
| Physical properties | VW (g/cm3) |
| VWC (g) |
| Clay (%) |
| Silt (%) |
| Sand (%) |
| Chemical properties | TC (mg/g) |
| TN (mg/g) |
| TP (mg/g) |
| C/N |
| NO3--N (mg/kg) |
| NH4+-N (mg/kg) |
| pH |
| EC (ms/m） |
| Biological properties | Phosphatases(mg/g.d-1) |
| Urase (mg/g.d-1) |
| Sucrase (mg/g.d-1) |
| Plant properties | MY (kg/hm2) |

**Table S3. Raw and clean reads number of each sample**

| **sample** | **group** | **Read length (bp)** | **Raw reads** | **Clean reads** | **Percent in raw reads(%)** |
| --- | --- | --- | --- | --- | --- |
| Y1_1 | CPR | 150 | 93967744 | 92765252 | 98.72031407 |
| Y2_1 | CPR | 150 | 90182634 | 88915672 | 98.59511533 |
| Y3_1 | CPR | 150 | 94025924 | 92998178 | 98.90695464 |
| Y1_2 | CPG | 150 | 94102354 | 92887228 | 98.70871881 |
| Y2_2 | CPG | 150 | 93520202 | 91974952 | 98.34768321 |
| Y3_2 | CPG | 150 | 92704174 | 91127118 | 98.29882957 |
| Y1_3 | SPR | 150 | 87719974 | 86411850 | 98.50875013 |
| Y2_3 | SPR | 150 | 89183030 | 87680706 | 98.31545979 |
| Y3_3 | SPR | 150 | 94973590 | 93987940 | 98.96218517 |
| Y1_4 | SPG | 150 | 89898962 | 88564832 | 98.51596729 |
| Y2_4 | SPG | 150 | 98838484 | 97340248 | 98.48415724 |
| Y3_4 | SPG | 150 | 93808212 | 92223682 | 98.31088349 |
| Y1_9 | CK | 150 | 94288408 | 91872780 | 97.4380435 |
| Y2_9 | CK | 150 | 72228132 | 71116408 | 98.46081579 |
| Y3_9 | CK | 150 | 76138838 | 75303808 | 98.90327982 |

**Table S4. Topological characteristics of total microbial network under different fertilization treatments and beneficial microbial subnetwork**

| **Treatment** | **Nodes** | **Edges** | **Average degree** | **Average path length** |
| --- | --- | --- | --- | --- |
| **CK** | 800 | 26721 | 69.8025 | 2.1554 |
| **Green manuring** | 800 | 32794 | 81.9850 | 2.3031 |
| **Root stubble** | 800 | 33687 | 84.2175 | 2.2941 |
| **Beneficial microorganisms** | 56 | 299 | 8.6786 | 2.3461 |
| **Treatment** | **Clustering**  **coefficient** | **Betweenness**  **centralization** | **Degree**  **centralization** | **Modularity** |
| **CK** | 0.4581 | 0.0025 | 0.1294 | 0.3156 |
| **Green manuring** | 0.5083 | 0.0029 | 0.1326 | 0.3536 |
| **Root stubble** | 0.5375 | 0.0029 | 0.1674 | 0.3153 |
| **Beneficial microorganisms** | 0.5830 | 0.0032 | 0.2603 | 0.2609 |

**Table S5.** **keystone species in the network under different fertilization treatments**

|  | |  | **Module hubs** | |  |  | |
| --- | --- | --- | --- | --- | --- | --- | --- |
| **CK** | **Function** | **Green manuring** | | **Function** | **Root stubble** | | **Function** |
| *Aquabacter* | - | *Thermogemmatispora* | | - | *Verrucomicrobium* | | - |
| *Gloeobacter* | - | *Thermoflexus* | | - | *Solihabitans* | | - |
| *Roseobacter* | - | *Thermocrispum* | | - | *Pelomonas* | | - |
| *Silicimonas* | - | *Tahibacter* | | - | *Nodosilinea* | | - |
| *Actinoalloteichus* | - | *Syntrophus* | | - | *Methyloversatilis* | | - |
| *Hoyosella* | - | *Pseudokineococcus* | | - | *Leptothrix* | | - |
|  |  | *Oerskovia* | | - | *Herbiconiux* | | - |
|  |  | *Methyloversatilis* | | - | *Desulfobacter* | | - |
|  |  | *Magnetofaba* | | - | *Collimonas* | | - |
|  |  | *Leucobacter* | | - | *Arsenicicoccus* | | - |
|  |  | *Hongsoonwoonella* | | - | *Aquabacter* | | - |
|  |  | *Chromobacterium* | | - | *Antricoccus* | | - |
|  |  | *Aliiroseovarius* | | - | *Allokutzneria* | | - |
|  |  | *Actibacterium* | | - | *Actinospica* | | - |
|  |  | *Acidibrevibacterium* | | - |  | |  |
|  | | **Connectors（beneficial genus）** | | |  |  | |
| **CK** | **Function** | **Green manuring** | | **Function** | **CK** | | **Function** |
| *Paenibacillus* | DR | *Paenibacillus* | | DR | *Paenibacillus* | | DR |
| *Klebsiella* | DR | *Klebsiella* | | DR | *Klebsiella* | | DR |
| *Flavobacterium* | DR | *Flavobacterium* | | DR | *Flavobacterium* | | DR |
| *Nocardia* | PD | *Nocardia* | | PD | *Nocardia* | | PD |
| *Mycobacterium* | PD | *Mycobacterium* | | PD | *Mycobacterium* | | PD |
| *Ideonella* | PD | *Marinobacterium* | | PD | *Ideonella* | | PD |
| *Conexibacter* | PD | *Ideonella* | | PD | *Conexibacter* | | PD |
| *Thiobacillus* | NPK | *Conexibacter* | | PD | *Thiobacillus* | | NPK |
| *Sinorhizobium* | NPK | *Alcanivorax* | | PD | *Sinorhizobium* | | NPK |
| *Shinella* | NPK | *Brevibacillus* | | NPK | *Shinella* | | NPK |
| *Rhizopus* | NPK | *Thiobacillus* | | NPK | *Rhizopus* | | NPK |
| *Rhizobium* | NPK | *Sinorhizobium* | | NPK | *Rhizobium* | | NPK |
| *Neorhizobium* | NPK | *Shinella* | | NPK | *Neorhizobium* | | NPK |
| *Microvirga* | NPK | *Rhizopus* | | NPK | *Microvirga* | | NPK |
| *Methylobacterium* | NPK | *Rhizobium* | | NPK | *Methylobacterium* | | NPK |
| *Mesorhizobium* | NPK | *Neorhizobium* | | NPK | *Mesorhizobium* | | NPK |
| *Frankia* | NPK | *Microvirga* | | NPK | *Frankia* | | NPK |
| *Ensifer* | NPK | *Methylobacterium* | | NPK | *Ensifer* | | NPK |
| *Cupriavidus* | NPK | *Mesorhizobium* | | NPK | *Cupriavidus* | | NPK |
| *Burkholderia* | NPK | *Frankia* | | NPK | *Burkholderia* | | NPK |
| *Bradyrhizobium* | NPK | *Ensifer* | | NPK | *Bradyrhizobium* | | NPK |
| *Azorhizobium* | NPK | *Cupriavidus* | | NPK | *Azorhizobium* | | NPK |
| *Arthrobacter* | NPK | *Burkholderia* | | NPK | *Arthrobacter* | | NPK |
| *Agrobacterium* | NPK | *Bradyrhizobium* | | NPK | *Agrobacterium* | | NPK |
| *Streptomyces* | PA | *Arthrobacter* | | NPK | *Streptomyces* | | PA |
| *Stenotrophomonas* | PA | *Agrobacterium* | | NPK | *Stenotrophomonas* | | PA |
| *Pseudomonas* | PA | *Acinetobacter* | | NPK | *Pseudomonas* | | PA |
| *Micromonospora* | PA | *Streptomyces* | | PA | *Micromonospora* | | PA |
| *Herbaspirillum* | PA | *Stenotrophomonas* | | PA | *Herbaspirillum* | | PA |
| *Bacillus* | PA | *Pseudomonas* | | PA | *Bacillus* | | PA |
| *Amycolatopsis* | PA | *Micromonospora* | | PA | *Amycolatopsis* | | PA |
|  |  | *Herbaspirillum* | | PA |  | |  |
|  |  | *Curtobacterium* | | PA |  | |  |
|  |  | *Bacillus* | | PA |  | |  |
|  |  | *Amycolatopsis* | | PA |  | |  |

**Table S6. Soil properties and yield under different fertilization treatments**

| **Indicators** | **CK** | **CPG** | **CPR** | **SPG** | **SPR** |
| --- | --- | --- | --- | --- | --- |
| VW (g/cm3) | 1.17±0.02a | 1.09±0.01c | 1.14±0.02b | 1.14±0.01b | 1.11±0.01bc |
| VWC (g) | 0.16±0.002d | 0.172±0.001ab | 0.17±0.001c | 0.17±0b | 0.173±0.001a |
| TC (mg/g) | 31.03±1.68a | 32.37±1.01a | 31.8±0.30a | 31.35±0.05a | 31.8±0.89a |
| TN (mg/g) | 1.6±0.20b | 1.87±0.12ab | 1.93±0.06a | 1.6±0.10b | 2.03±0.23a |
| TP (mg/g) | 1.25±0.01a | 1.28±0.05a | 1.27±0.05a | 1.23±0.08a | 1.32±0.14a |
| C/N | 19.47±1.17ab | 17.24±0.53bc | 16.44±0.55c | 13.4±1.20a | 15.61±1.93c |
| NO3--N (mg/kg) | 7.01±1.30c | 13.22±2.88a | 9.41±1.41bc | 11.13±0.43ab | 9.15±1.75bc |
| NH4+-N (mg/kg) | 4.75±0.91d | 6.42±0.13c | 5.87±0.81cd | 19.52±0.67b | 24.7±0.13a |
| pH | 8.04±0.02b | 8.09±0.04a | 8.05±0.01b | 8.04±0.02b | 8.05±0.01b |
| EC (ms/m） | 22.79±2.47a | 24.03±1.00a | 23.13±1.05a | 23±1.40a | 23.77±1.80a |
| Phosphatases (mg/g.d-1) | 351.16±68.15b | 495.75±31.57ab | 520.19±21.16ab | 630.16±202.44a | 609.8±183.42ab |
| Urase (mg/g.d-1) | 206.01±36.81b | 253.62±10.01ab | 233.63±41.5ab | 264.26±14.58a | 242.18±11.62ab |
| Sucrase (mg/g.d-1) | 122.11±19.28c | 397.39±58.91b | 220.65±34.63c | 596.5±82.66a | 162.33±42.26c |
| Clay (%) | 16.94±0.96a | 16.26+0.19ab | 16.15+0.93b | 15.96+0.70ab | 15.40+0.24b |
| Silt (%) | 59.00±6.55a | 56.17+0.12a | 56.84+1.70a | 56.79+3.71a | 55.63+1.48a |
| Sand (%) | 24.05±7.51a | 27.58+0.07a | 27.01±2.62a | 27.25+3.00a | 28.97+1.71a |
| MY (kg/hm2) | 12402.82±98.18c | 13041.53±93.06a | 12629.34±51.06b | 12774.7±54.35b | 13227.57±177.12a |

Values (mean ± standard deviation) indicate the absolute amount of each characteristic(n=3).

Different lowercase letters in a row indicate a significant difference (*p*< 0.05).

**Table S7.** **Mantel test index of beneficial microbial communities and soil environmental factors and yield**

| Soil Property | Beneficial Microorganism | | Soil Property | Beneficial Microorganism | |
| --- | --- | --- | --- | --- | --- |
| *r* | *p* | *r* | *p* |
| VW | 0.328 | 0.027* | EC | 0.132 | 0.199 |
| VWC | 0.817 | 0.001** | URE | -0.093 | 0.656 |
| TN | -0.047 | 0.473 | SC | 0.156 | 0.213 |
| TC | -0.038 | 0.432 | PHO | -0.012 | 0.425 |
| C/N | 0.006 | 0.36 | MY | 0.423 | 0.007** |
| TP | -0.174 | 0.896 | Clay | -0.031 | 0.49 |
| NH4+-N | 0.001 | 0.376 | Silt | -0.120 | 0.674 |
| NO3--N | 0.203 | 0.131 | Sand | -0.097 | 0.669 |
| pH | -0.104 | 0.647 |  |  |  |

Note: *r* is the correlation coefficient of Mantel test.**p* value < 0.05;***p* value < 0.01.

**Table S8.** **Correlation analysis between beneficial microbial communities with different functions and soil characteristics and yield**

|  | NPK | PA | DR | MP |
| --- | --- | --- | --- | --- |
| VWC | 0.57* | 0.62* | 0.32 | 0.41 |
| VW | -0.50 | -0.38 | -0.12 | 0.03 |
| URE | -0.13 | -0.31 | -0.25 | -0.13 |
| TP | -0.05 | -0.29 | -0.05 | -0.30 |
| TN | -0.12 | 0.13 | -0.05 | 0.03 |
| TC | -0.16 | 0.00 | -0.25 | -0.33 |
| SC | 0.37 | 0.26 | 0.19 | 0.18 |
| PHO | 0.04 | -0.04 | 0.00 | -0.23 |
| pH | 0.16 | -0.05 | -0.19 | -0.20 |
| NO3.N | 0.69** | 0.27 | 0.18 | -0.21 |
| NH4.N | 0.51 | 0.59* | 0.35 | 0.49 |
| MY | 0.54* | 0.60* | 0.26 | 0.38 |
| EC | 0.00 | 0.15 | -0.03 | 0.26 |
| C/N | 0.10 | -0.15 | -0.05 | -0.05 |
| Silt | -0.26 | -0.22 | -0.26 | -0.23 |
| Sand | 0.24 | 0.28 | 0.26 | 0.28 |
| Clay | -0.17 | -0.29 | 0.00 | -0.24 |

Note:The asterisk indicates significance.(*p<0.05;**p<0.01)


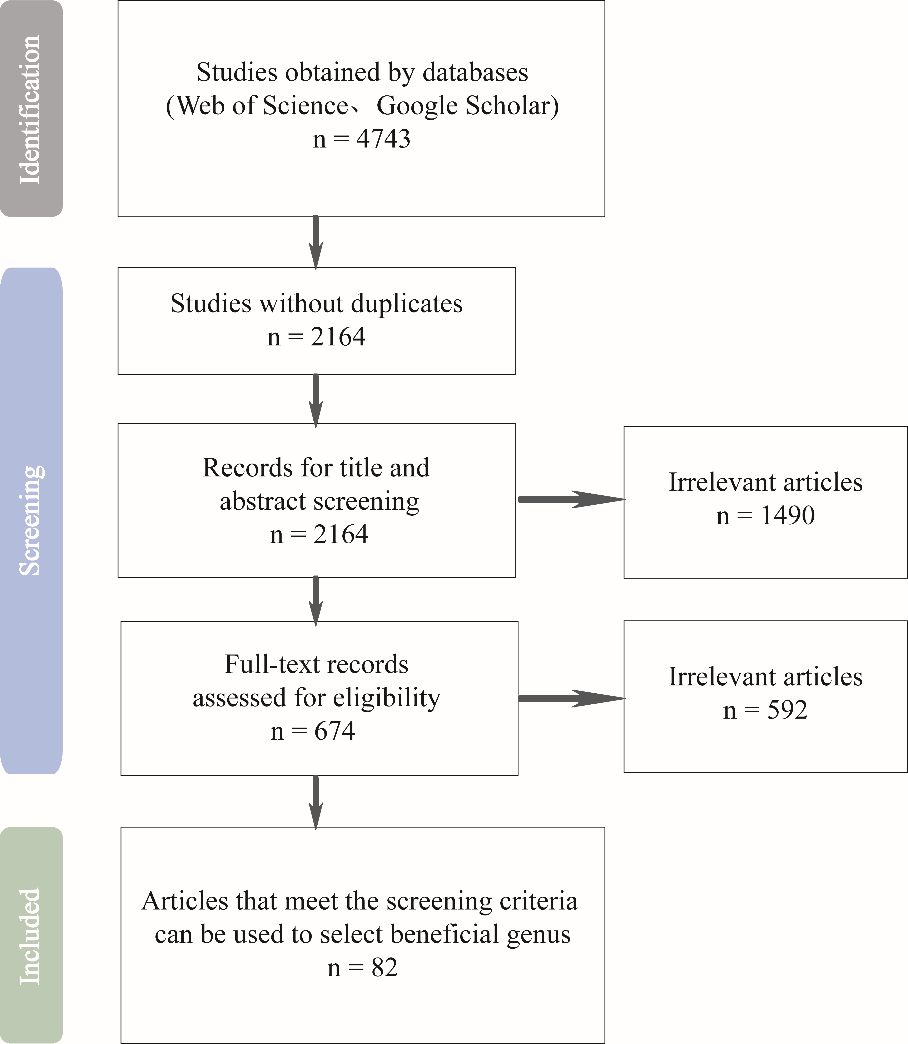


**Figure_S1 PRISMA workflow.**


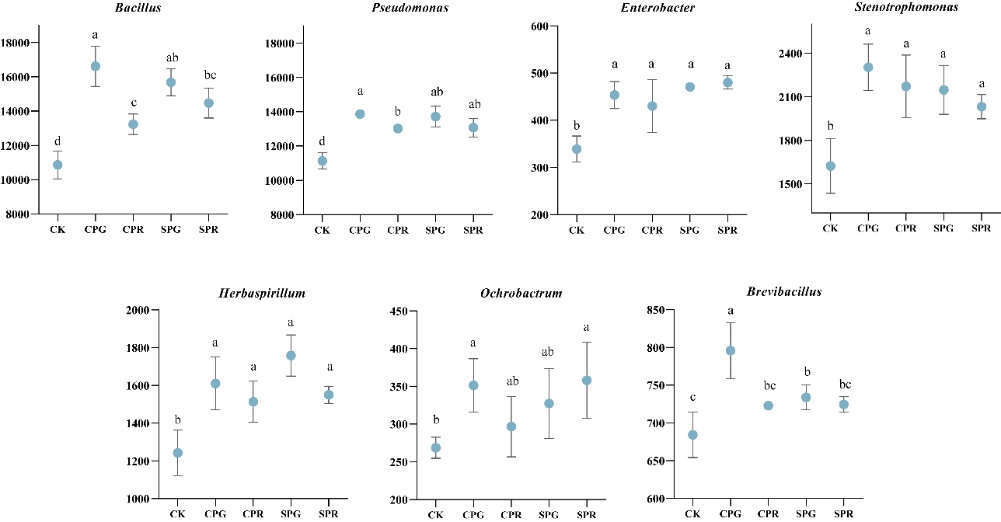


**Figure_S2 The abundance changes of multifunctional genera under different fertilization treatments.**


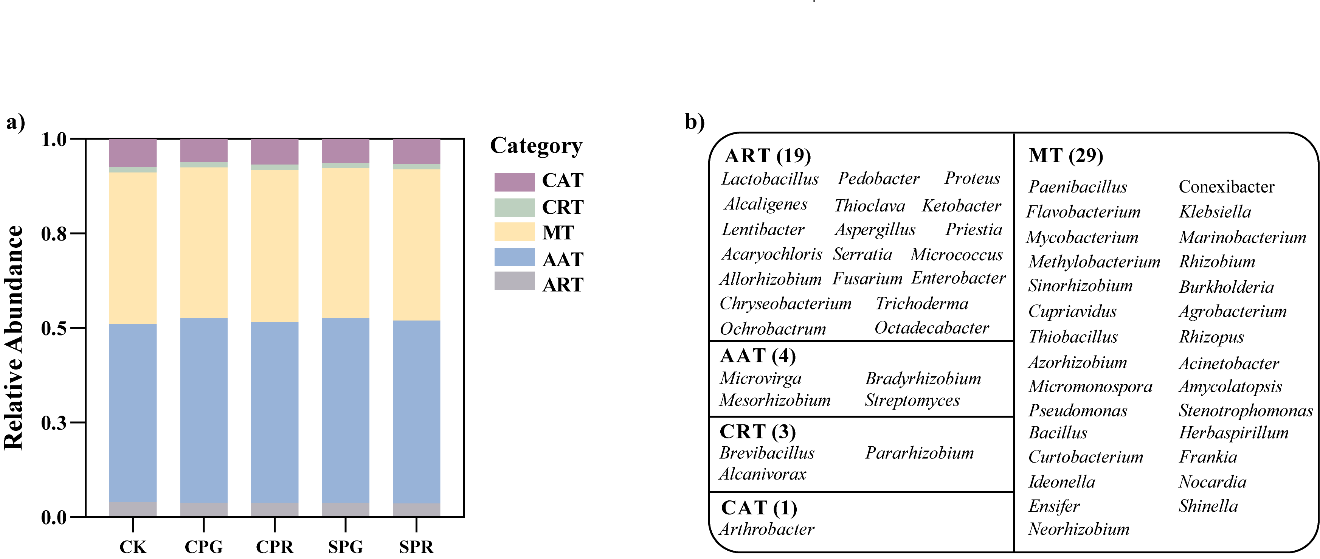


**Figure_S3a. Relative abundance of all categories in the total microbial community under different treatments. b. Genus of beneficial microorganisms under each category. ART:alaways rare taxa. AAT: alaways abundant taxa. MT: moderate taxa. CRT: conditionally rare taxa. CAT: conditionally abundant taxa. CRAT: conditionally rare or abundant taxa(Not available in this sample).**


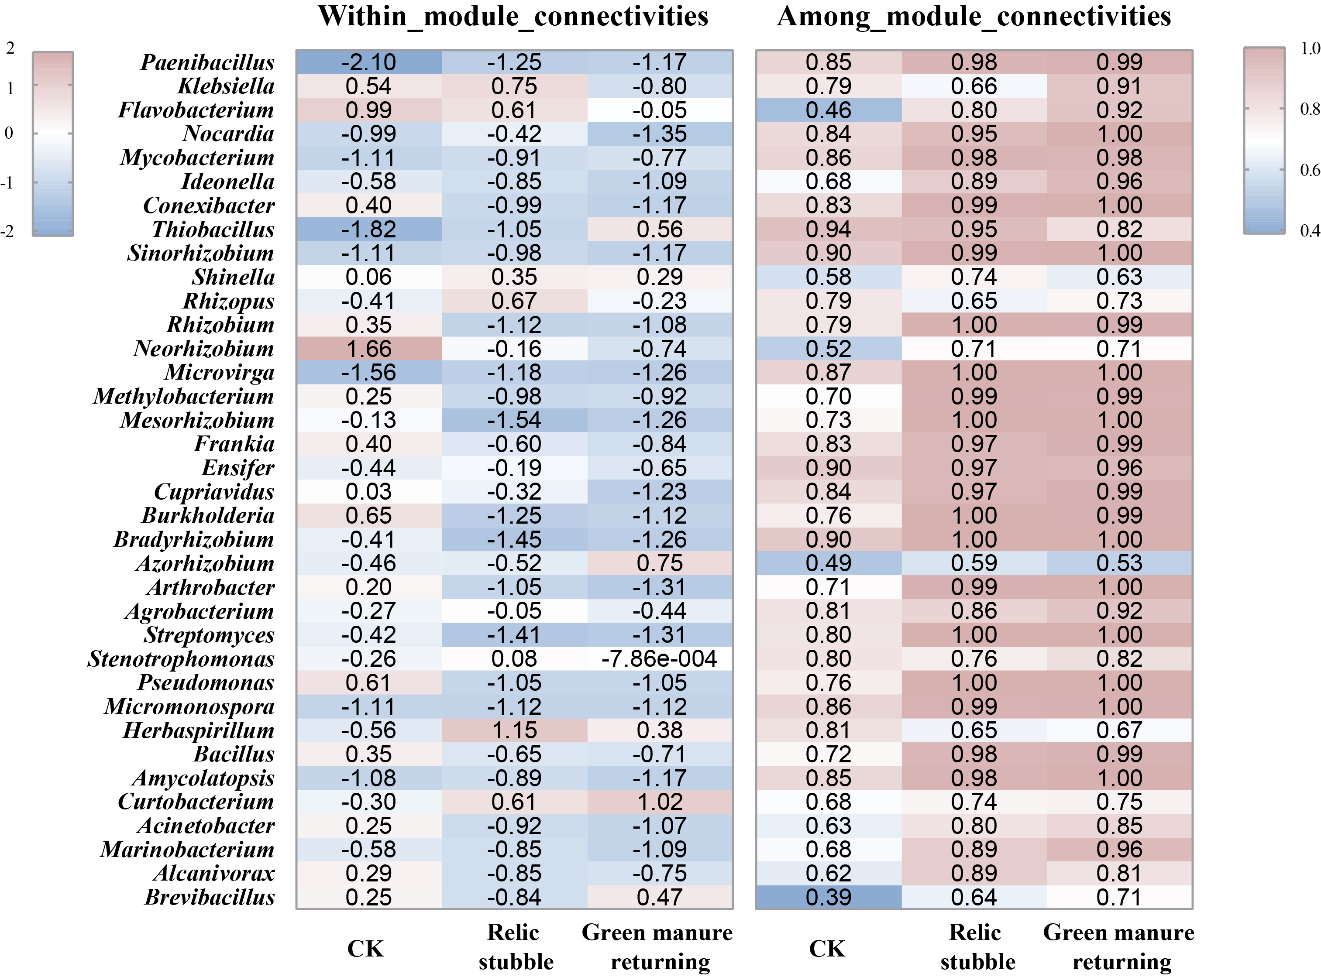


**Figure_S4 Within-module connectivities (Zi) and among-module connectivities (Pi) under different fertilization treatments.**
